# Supplementary material for: AKT3 Expression in Mesenchymal Colorectal Cancer Cells Drives Growth and Is Associated with Epithelial-Mesenchymal Transition
Source: MDPI journal article supplement (doi:10.3390/cancers13040801), 2021-02-14
Supplement: s1 [file s1]

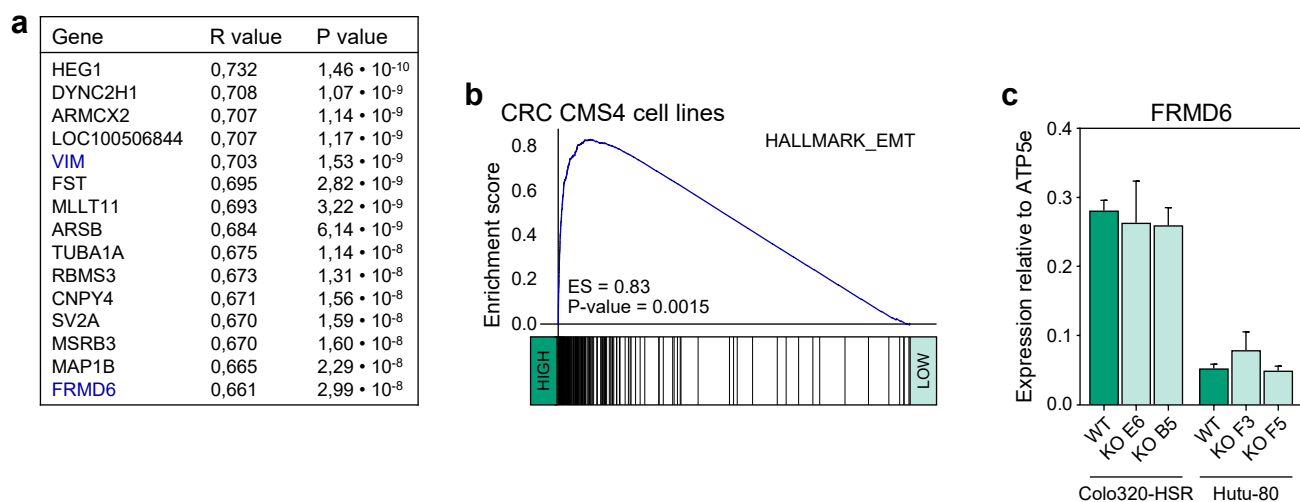

**Supplementary Figure 4.** FRMD6 expression is correlated to AKT3 expression and EMT in CRC cell lines. (a) Table summarising top 15 genes of which expression positively correlates with AKT3 expression; (b) GSEA on 20% high versus 20% low FRMD6 expressing CMS4 CRC cell lines; (c) Quantitative real time PCR analysis of FRMD6 expression in wildtype and AKT3 KO cell lines. Expression level was normalised to ATP5E expression, average and S.D. of 3 technical replicates is plotted per cell line. Normalisation to GUSB yielded similar results.
