# Supplementary material for: AKT3 Expression in Mesenchymal Colorectal Cancer Cells Drives Growth and Is Associated with Epithelial-Mesenchymal Transition
Source: MDPI journal article supplement (doi:10.3390/cancers13040801), 2021-02-14
Supplement: s1 [file s1]

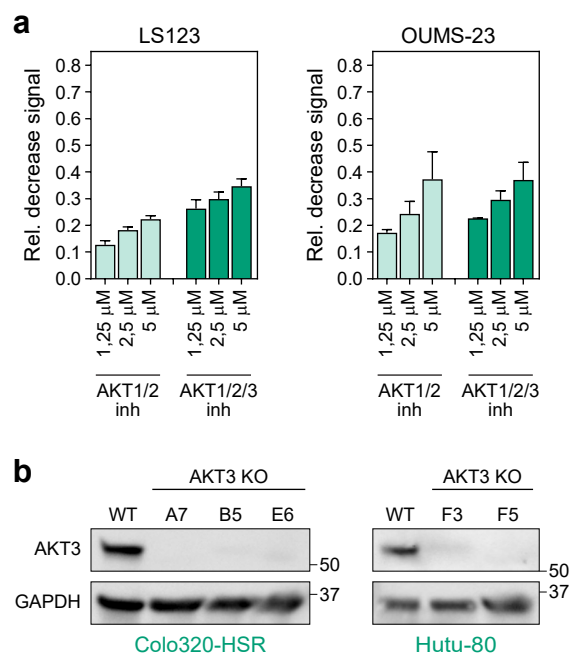

**Supplementary Figure 2.** CMS4 cell lines lacking AKT3 expression. **(a)** Bar graphs depicting the average decrease in CellTiter Blue signal of low AKT3 expressing CMS4 cell lines upon treatment with AKT1/2 kinase inhibitor and AKT1/2/3 inhibitor (MK2206). All values were normalised to signal in DMSO treated control conditions. Bar graphs indicate mean of three independent experiments, error bars indicate S.D.; **(b)** Western blot images confirming successful CRISPR-based knockout (KO) of AKT3 in single cell clones generated for Colo320-HSR and Hutu-80. WT; Wildtype.
