# Supplementary material for: AKT3 Expression in Mesenchymal Colorectal Cancer Cells Drives Growth and Is Associated with Epithelial-Mesenchymal Transition
Source: MDPI journal article supplement (doi:10.3390/cancers13040801), 2021-02-14
Supplement: s1 [file s1]

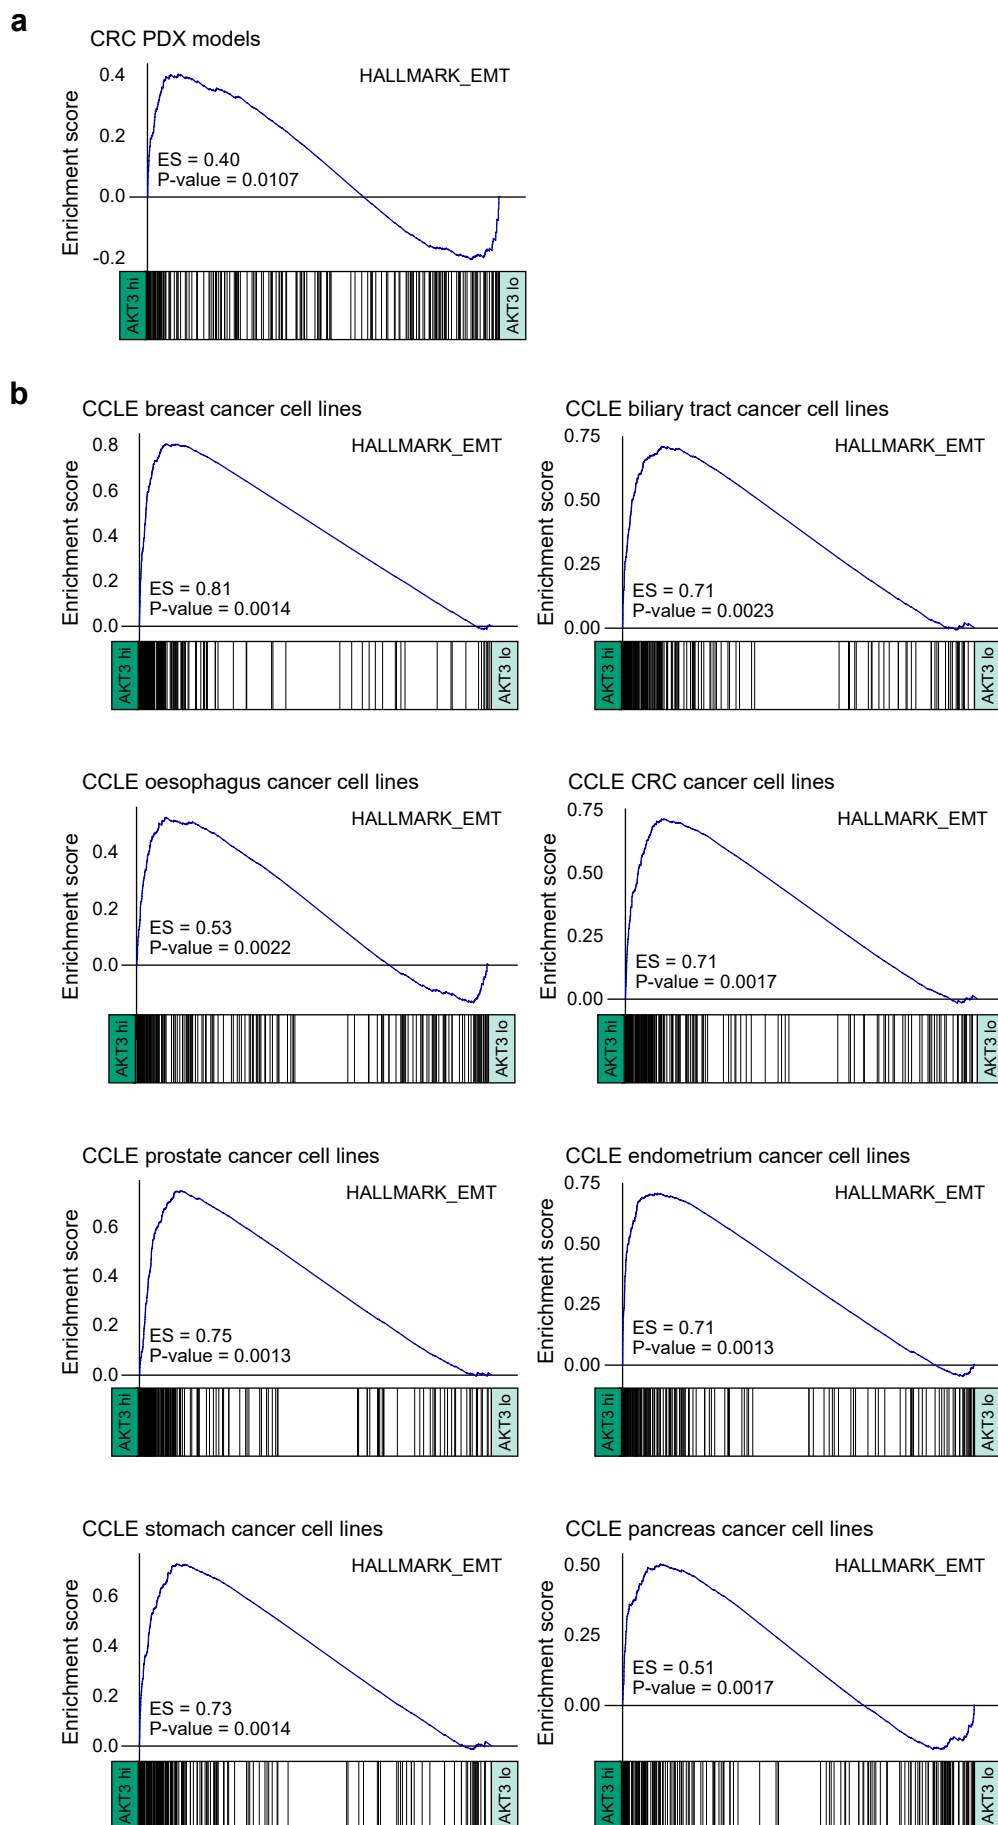

**Supplementary Figure 3.** EMT gene expression is enriched in pre-clinical models highly expressing AKT3 across multiple carcinoma cell lines. (a) GSEA on PDX models. Cut-off for AKT3 high and low expression was set to 2Log expression >3.5 and <1, respectively; (b) GSEA on 50% high versus 50% low AKT3 expressing carcinoma cell lines included in the CCLE panel, separated per cancer type.
