# Supplementary material for: AKT3 Expression in Mesenchymal Colorectal Cancer Cells Drives Growth and Is Associated with Epithelial-Mesenchymal Transition
Source: MDPI journal article supplement (doi:10.3390/cancers13040801), 2021-02-14
Supplement: s1 [file s1]

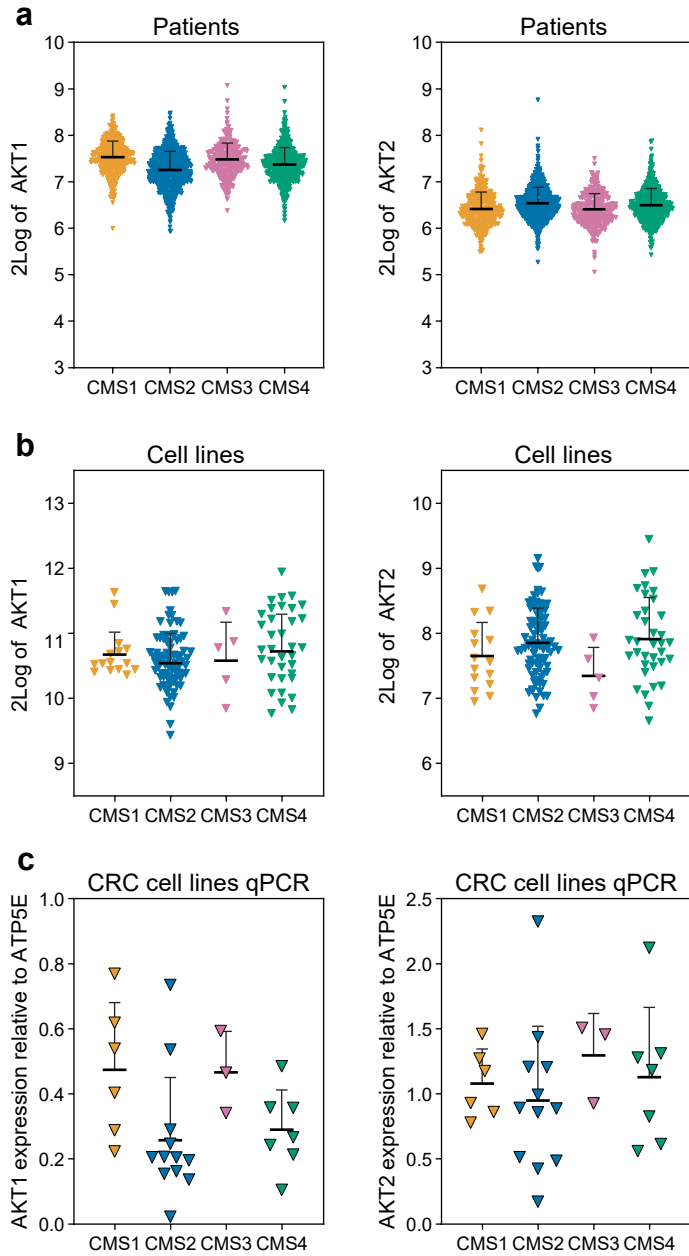

**Supplementary Figure 1.** AKT1 and AKT2 are not differentially expressed between CMS. (**a,b**) 2Log mRNA expression levels of AKT1 and AKT2 in CRC patients (**a**) and (primary) cell lines (**b**) as determined by microarray or RNAseq; (**c**) Quantitative real time PCR analysis of AKT1 and AKT2 expression in 28 established CRC cell lines. Expression level was normalised to ATP5E expression, average normalised expression of N=3, each performed with technical triplicates, is plotted per cell line. Normalisation to GUSB yielded similar results.
