# Supplementary material for: AKT3 Expression in Mesenchymal Colorectal Cancer Cells Drives Growth and Is Associated with Epithelial-Mesenchymal Transition
Source: Cancers (Basel). 2021 Feb 14;13(4):801. doi: 10.3390/cancers13040801 (PMC7918753; doi:10.3390/cancers13040801)
Supplement: Supplementary file 1 [file cancers-13-00801-s001.zip]

Archive with 6 entries (6 files):
- Buikhuisen, Gomez Barila at al - Cancers -  Material S1 - western blot full membrane images.pptx
- Buikhuisen, Gomez Barila et al - Cancers - Figure S1.pdf
- Buikhuisen, Gomez Barila et al - Cancers - Figure S2.pdf
- Buikhuisen, Gomez Barila et al - Cancers - Figure S3.pdf
- Buikhuisen, Gomez Barila et al - Cancers - Figure S4.pdf
- Buikhuisen, Gomez Barila et al - Cancers - Table S1.xlsx
