# Supplementary material for: AKT3 Expression in Mesenchymal Colorectal Cancer Cells Drives Growth and Is Associated with Epithelial-Mesenchymal Transition
Source: Cancers (Basel). 2021 Feb 14;13(4):801. doi: 10.3390/cancers13040801 (PMC7918753; doi:10.3390/cancers13040801)
Supplement: Supplementary file 1 [file cancers-13-00801-s001.zip › Buikhuisen, Gomez Barila et al - Cancers - Table S1.xlsx]

## Sheet: CMS
			CCLE			CLM			Medico			Sanger			Palermo/Rome/Rome/Rome			Spheroids			Biobank
			GSE36133			GSE100478			GSE59857			GSE68950			Unpublished			GSE100479 and GSE100549			GSE100549
Cell line	Data	Final CMS	Predicted CMS	Nearest CMS	Probability Score	Predicted CMS	Nearest CMS	Probability Score	Predicted CMS	Nearest CMS	Probability Score	Predicted CMS	Nearest CMS	Probability Score	Predicted CMS	Nearest CMS	Probability Score	Predicted CMS	Nearest CMS	Probability Score	Predicted CMS	Nearest CMS	Probability Score
CL11	ccle	CMS4		CMS4	0.445475					CMS4	0.433413
COLO205	ccle	CMS2	CMS2	CMS2	0.569245					CMS2	0.319212		CMS2	0.350071
COLO678	ccle	CMS4	CMS4	CMS4	0.696628				CMS4	CMS4	0.553851	CMS1	CMS1	0.57476
CW2	ccle	N/A		CMS2	0.480463								CMS2	0.37925
HCT15	ccle	N/A		CMS1	0.392381					CMS4	0.451962		CMS4	0.435367
HT115	ccle	CMS2		CMS2	0.450485				CMS2	CMS2	0.5477
HT29	ccle	N/A		CMS2	0.373661					CMS4	0.394542		CMS2	0.395745
NCIH716	ccle	CMS4	CMS4	CMS4	0.78796	CMS4	CMS4	0.691641	CMS4	CMS4	0.767152	CMS4	CMS4	0.794343
NCIH747	ccle	CMS4	CMS4	CMS4	0.528403					CMS4	0.395048		CMS4	0.496068
SKCO1	ccle	N/A		CMS2	0.419779					CMS3	0.376506		CMS2	0.390616
SW620	ccle	CMS4		CMS4	0.370217				CMS4	CMS4	0.528416	CMS4	CMS4	0.533979
SW837	ccle	CMS4	CMS4	CMS4	0.707675				CMS4	CMS4	0.545277	CMS4	CMS4	0.614777
HCT116	ccle	CMS1	CMS1	CMS1	0.857688	CMS1	CMS1	0.726724		CMS1	0.477905		CMS1	0.442208
KM12	ccle	CMS1	CMS1	CMS1	0.844352	CMS1	CMS1	0.721831		CMS1	0.464372		CMS1	0.348633
LOVO	ccle	CMS1	CMS1	CMS1	0.723235				CMS1	CMS1	0.593195		CMS1	0.471746
LS411N	ccle	CMS1	CMS1	CMS1	0.726514				CMS1	CMS1	0.606067		CMS1	0.440481
RKO	ccle	CMS1	CMS1	CMS1	0.880341	CMS1	CMS1	0.648527	CMS4	CMS4	0.504414	CMS1	CMS1	0.566845
SW48	ccle	CMS1	CMS1	CMS1	0.813151	CMS1	CMS1	0.608811		CMS1	0.489399	CMS1	CMS1	0.564406
C2BBE1	ccle	CMS4	CMS4	CMS4	0.509913								CMS4	0.412916
CCK81	ccle	CMS2	CMS2	CMS2	0.825299				CMS2	CMS2	0.623753
HT55	ccle	CMS2	CMS2	CMS2	0.934826	CMS2	CMS2	0.953683	CMS2	CMS2	0.816531	CMS2	CMS2	0.929948
LS1034	ccle	CMS2	CMS2	CMS2	0.906069				CMS2	CMS2	0.719034	CMS2	CMS2	0.884712
RCM1	ccle	CMS2	CMS2	CMS2	0.822816	CMS2	CMS2	0.85555	CMS2	CMS2	0.694466	CMS2	CMS2	0.780426
SNUC1	ccle	CMS2	CMS2	CMS2	0.887355	CMS2	CMS2	0.90784	CMS2	CMS2	0.745734	CMS2	CMS2	0.907347
SW1116	ccle	CMS2	CMS2	CMS2	0.857917				CMS2	CMS2	0.769542	CMS2	CMS2	0.804531
SW1417	ccle	CMS2	CMS2	CMS2	0.821198				CMS2	CMS2	0.654294	CMS2	CMS2	0.739546
SW1463	ccle	CMS2	CMS2	CMS2	0.835479	CMS2	CMS2	0.870949	CMS2	CMS2	0.718076	CMS2	CMS2	0.681146
SW948	ccle	CMS2	CMS2	CMS2	0.834103	CMS2	CMS2	0.779446	CMS2	CMS2	0.651947	CMS2	CMS2	0.612308
T84	ccle	CMS2	CMS2	CMS2	0.845136				CMS2	CMS2	0.680943	CMS2	CMS2	0.717355
CL40	ccle	CMS3	CMS3	CMS3	0.851372	CMS3	CMS3	0.714986	CMS3	CMS3	0.737504
LS180	ccle	CMS3	CMS3	CMS3	0.779908	CMS3	CMS3	0.824765		CMS3	0.466167
LS513	ccle	CMS3	CMS3	CMS3	0.816784	CMS3	CMS3	0.841577	CMS3	CMS3	0.509583	CMS3	CMS3	0.758015
COLO320	ccle	CMS4	CMS4	CMS4	0.829425	CMS4	CMS4	0.731421	CMS4	CMS4	0.650306	CMS4	CMS4	0.777531
HUTU80	ccle	CMS4	CMS4	CMS4	0.87836	CMS4	CMS4	0.782099	CMS4	CMS4	0.567432
LS123	ccle	CMS4	CMS4	CMS4	0.757548				CMS4	CMS4	0.61143	CMS4	CMS4	0.657704
MDST8	ccle	CMS4	CMS4	CMS4	0.875059	CMS4	CMS4	0.864408	CMS4	CMS4	0.852628
OUMS23	ccle	CMS4	CMS4	CMS4	0.775182	CMS4	CMS4	0.706218	CMS4	CMS4	0.531576
CL14	ccle	CMS2	CMS2	CMS2	0.862633				CMS2	CMS2	0.714862
CL34	ccle	CMS3	CMS3	CMS3	0.66522					CMS3	0.402778
DLD1	ccle	N/A		CMS1	0.448821					CMS4	0.321922
GP2D	ccle	CMS2	CMS2	CMS2	0.647104				CMS2	CMS2	0.677858	CMS2	CMS2	0.539068
HCC56	ccle	CMS2	CMS2	CMS2	0.873523
HS675T	ccle	CMS4	CMS4	CMS4	0.690333
HS698T	ccle	CMS4	CMS4	CMS4	0.866816
NCIH508	ccle	CMS4	CMS2	CMS2	0.878231				CMS2	CMS2	0.69263	CMS2	CMS2	0.856502
SNU1040	ccle	N/A		CMS3	0.328823					CMS1	0.328801
SNU175	ccle	N/A		CMS1	0.475958					CMS4	0.322738
SNU283	ccle	CMS2	CMS2	CMS2	0.588075				CMS2	CMS2	0.640662
SNU407	ccle	N/A		CMS2	0.341748					CMS2	0.356147
SNU503	ccle	CMS4	CMS4	CMS4	0.628476				CMS4	CMS4	0.579909
SNU61	ccle	CMS2	CMS2	CMS2	0.515147				CMS2	CMS2	0.596564
SNUC2A	ccle	N/A		CMS1	0.488743				CMS4	CMS4	0.554163
SNUC4	ccle	N/A		CMS3	0.340386					CMS2	0.453362
SNUC5	ccle	CMS1	CMS1	CMS1	0.53396					CMS1	0.466641
SW403	ccle	CMS2	CMS2	CMS2	0.851837				CMS2	CMS2	0.722286	CMS4	CMS4	0.542957
SW480	ccle	CMS4	CMS4	CMS4	0.644652				CMS4	CMS4	0.685872
CAR1	clm	CMS4				CMS4	CMS4	0.747891	CMS4	CMS4	0.677694	CMS4	CMS4	0.671812
HCC2998	medico	CMS2								CMS2	0.477091	CMS2	CMS2	0.513735
SNUC2B	medico	N/A								CMS1	0.340667		CMS4	0.323493
LS174T	medico	CMS3							CMS3	CMS3	0.540621	CMS3	CMS3	0.700314
NCIH630	medico	CMS2							CMS2	CMS2	0.575447	CMS2	CMS2	0.762824
GP5D	medico	CMS2							CMS2	CMS2	0.650991	CMS2	CMS2	0.59341
COLO201	medico	N/A								CMS4	0.415302
HDC135	medico	CMS4							CMS4	CMS4	0.528836
HDC9	medico	N/A								CMS2	0.365987
HROC24	medico	N/A								CMS3	0.411101
HROC87	medico	N/A								CMS4	0.309128
KM20	medico	N/A								CMS2	0.390363
LIM2412	medico	CMS1							CMS1	CMS1	0.501661
LIM2551	medico	N/A								CMS3	0.360552
SNU1033	medico	N/A								CMS2	0.498914
HROC32	medico	CMS2							CMS2	CMS2	0.737438
HROC69	medico	N/A								CMS4	0.375073
V457	medico	N/A								CMS2	0.334069
HROC39	medico	CMS2							CMS2	CMS2	0.564349
HROC46	medico	CMS2							CMS2	CMS2	0.538258
SNU1047	medico	N/A								CMS2	0.416201
SW1222	medico	CMS2							CMS2	CMS2	0.583888
WIDR	medico	N/A								CMS4	0.368288
HROC80	medico	N/A								CMS2	0.412942
COLO60H	medico	CMS2							CMS2	CMS2	0.60285
HROC18	medico	N/A								CMS2	0.445554
COGA1	medico	N/A								CMS1	0.292235
COGA2	medico	CMS2							CMS2	CMS2	0.614681
COGA3	medico	CMS2							CMS2	CMS2	0.587104
COGA8	medico	CMS2							CMS2	CMS2	0.508151
COGA12	medico	CMS2							CMS2	CMS2	0.655716
HDC8	medico	N/A								CMS4	0.44342
C170	medico	N/A								CMS4	0.311478
V703	medico	N/A								CMS2	0.427108
HCA24	medico	CMS2							CMS2	CMS2	0.634124
V481	medico	N/A								CMS3	0.397469
MIP101	medico	N/A								CMS4	0.35484
HRA16	medico	CMS2							CMS2	CMS2	0.771315
LIM1215	medico	CMS2							CMS2	CMS2	0.592942
CX1	medico	N/A								CMS2	0.324918
VACO5	medico	CMS4							CMS4	CMS4	0.580099
VACO432	medico	N/A								CMS2	0.36041
HCA7	medico	CMS4							CMS4	CMS4	0.511271
LIM2405	medico	N/A								CMS4	0.434874
HDC82	medico	CMS2							CMS2	CMS2	0.690073
HDC142	medico	CMS2							CMS2	CMS2	0.694487
HDC54	medico	CMS2							CMS2	CMS2	0.588476
OXCO1	medico	CMS4							CMS4	CMS4	0.810797
LIM2537	medico	N/A								CMS4	0.480016
LIM1899	medico	N/A								CMS2	0.364788
LIM2099	medico	CMS4							CMS4	CMS4	0.621391
OXCO2	medico	CMS2							CMS2	CMS2	0.65569
OXCO3	medico	CMS2							CMS2	CMS2	0.578101
COGA5	medico	N/A								CMS4	0.450403
COGA5L	medico	CMS2							CMS2	CMS2	0.612072
COLO94H	medico	CMS2							CMS2	CMS2	0.765681
FET	medico	N/A								CMS2	0.483848
FHC	medico	CMS4							CMS4	CMS4	0.777887
RW7213	medico	CMS2							CMS2	CMS2	0.579808
SNU1411	medico	N/A								CMS2	0.325375
SNU1460	medico	CMS2							CMS2	CMS2	0.617664
SNU81	medico	N/A								CMS2	0.324721
CACO2	medico	N/A								CMS4	0.426727
HCT8	medico	N/A								CMS1	0.441903
COCM1	medico	CMS2							CMS2	CMS2	0.717853
LIM2550	medico	CMS4							CMS4	CMS4	0.601081
COLO320DM	medico	CMS4							CMS4	CMS4	0.753395
DIFI	medico	CMS2							CMS2	CMS2	0.597976
GEO	medico	CMS2							CMS2	CMS2	0.602778
HCA46	medico	CMS2							CMS2	CMS2	0.769652
C125PM	medico	CMS2							CMS2	CMS2	0.558332
FHS	medico	CMS4							CMS4	CMS4	0.817285
HDC114	medico	N/A								CMS2	0.454946
HDC143	medico	CMS2							CMS2	CMS2	0.558603
KM12C	medico	CMS1							CMS1	CMS1	0.510663
KM12L4	medico	N/A								CMS1	0.472859
KM12SM	medico	N/A								CMS1	0.374915
SNU1235	medico	N/A								CMS4	0.437142
SNU1406	medico	CMS2							CMS2	CMS2	0.641686
SNU1544	medico	N/A								CMS3	0.278533
C10	medico	CMS4							CMS4	CMS4	0.592433
C106	medico	CMS2							CMS2	CMS2	0.501327
C146	medico	N/A								CMS2	0.429107
C32	medico	CMS2							CMS2	CMS2	0.589867
C70	medico	CMS2							CMS2	CMS2	0.730906
C75	medico	CMS2							CMS2	CMS2	0.673773
C80	medico	CMS2							CMS2	CMS2	0.643592
C84	medico	CMS2							CMS2	CMS2	0.543337
C99	medico	CMS2							CMS2	CMS2	0.658602
SNU1684	medico	N/A								CMS2	0.414503
SNU1746	medico	N/A								CMS2	0.328234
SNU254	medico	CMS4							CMS4	CMS4	0.607477
SNU479	medico	CMS2							CMS2	CMS2	0.718455
SNU70	medico	CMS4							CMS4	CMS4	0.608932
SNU977	medico	N/A								CMS4	0.457744
NCIH498	medico	CMS2							CMS2	CMS2	0.525831
NCIH684	medico	CMS2							CMS2	CMS2	0.550369
SNU769B	medico	CMS2							CMS2	CMS2	0.645851
SNU1181	medico	CMS2							CMS2	CMS2	0.547915
VACO6	medico	N/A								CMS2	0.332156
V411	medico	CMS2							CMS2	CMS2	0.516099
ColPa01-A1S1	Palermo/Rome	CMS1													CMS1	CMS1	0.596764
ColPa02-C1S3	Palermo/Rome	CMS4													CMS4	CMS4	0.546594
ColPa03-E1S5	Palermo/Rome	CMS1													CMS1	CMS1	0.512615
ColPa04-G1S7	Palermo/Rome	CMS2													CMS2	CMS2	0.621116
ColPa05-A2S9	Palermo/Rome	N/A														CMS2	0.383809
ColPa06-C2S11	Palermo/Rome	CMS2													CMS2	CMS2	0.657907
ColPa07-E2S13	Palermo/Rome	CMS2													CMS2	CMS2	0.507777
ColPa08-G2S15	Palermo/Rome	N/A														CMS2	0.457245
ColPa09-A3S17	Palermo/Rome	N/A														CMS2	0.313006
ColPa10-C3S19	Palermo/Rome	N/A														CMS2	0.475844
ColPa11-E3S21	Palermo/Rome	N/A														CMS2	0.347632
ColPa12-G3S23	Palermo/Rome	CMS2													CMS2	CMS2	0.612569
ColPa13-A4S1	Palermo/Rome	N/A														CMS2	0.36049
ColPa14-C4S3	Palermo/Rome	N/A														CMS2	0.323311
ColPa15-E4S5	Palermo/Rome	CMS2													CMS2	CMS2	0.540295
ColPa16-G4S7	Palermo/Rome	CMS1													CMS1	CMS1	0.573699
ColPa17-B5S10	Palermo/Rome	CMS2													CMS2	CMS2	0.67872
ColPa18-D5S12	Palermo/Rome	N/A														CMS2	0.429011
ColPa19-F5S14	Palermo/Rome	CMS2													CMS2	CMS2	0.506079
ColPa20-H5S16	Palermo/Rome	N/A														CMS4	0.452953
ColPa21-B6S18	Palermo/Rome	CMS2													CMS2	CMS2	0.565801
ColPa22-D6S20	Palermo/Rome	CMS4													CMS4	CMS4	0.674371
ColPa23-F6S22	Palermo/Rome	CMS2													CMS2	CMS2	0.554385
ColPa24-H6S24	Palermo/Rome	CMS2													CMS2	CMS2	0.851748
ColPa25-B7S26	Palermo/Rome	CMS2													CMS2	CMS2	0.521847
ColPa26-D7S28	Palermo/Rome	N/A														CMS3	0.437226
ColPa27-F7S30	Palermo/Rome	N/A														CMS4	0.276803
ColPa28-H7S32	Palermo/Rome	CMS2													CMS2	CMS2	0.630613
ColPa29-B8S34	Palermo/Rome	N/A														CMS2	0.47165
ColPa30-D8S36	Palermo/Rome	N/A														CMS1	0.421917
AG2	spheroids	CMS2																CMS2	CMS2	0.589949	CMS2	CMS2	0.62224
CO108	spheroids	CMS2																CMS2	CMS2	0.640273	CMS2	CMS2	0.808393
CO115	spheroids	CMS2								CMS4	0.443286								CMS2	0.362733	CMS2	CMS2	0.570708
CO123	spheroids	CMS1																CMS1	CMS1	0.588745		CMS1	0.450577
CO147	spheroids	CMS4																CMS4	CMS4	0.628262		CMS4	0.465614
CO152	spheroids	CMS2																CMS2	CMS2	0.580693	CMS2	CMS2	0.795168
CONC	spheroids	N/A																	CMS4	0.49606		CMS4	0.357946
DA13	spheroids	CMS4																CMS4	CMS4	0.617238	CMS4	CMS4	0.622324
G605	spheroids	CMS2																CMS2	CMS2	0.615597	CMS2	CMS2	0.624917
GTG7	spheroids	CMS2																	CMS2	0.457524	CMS2	CMS2	0.640674
LR13	spheroids	CMS1																	CMS1	0.448087	CMS1	CMS1	0.507482
LR14	spheroids	N/A																	CMS2	0.430971		CMS2	0.371935
ME59	spheroids	CMS2																CMS2	CMS2	0.560964	CMS2	CMS2	0.562698
RC511	spheroids	CMS4																	CMS4	0.49298	CMS4	CMS4	0.695002
LM23	spheroids	CMS2																CMS2	CMS2	0.731909
P11T	spheroids	N/A																	CMS4	0.303473
P14T10	spheroids	CMS2																CMS2	CMS2	0.656966
P16T7	spheroids	N/A																	CMS2	0.410306
P17T10	spheroids	N/A																	CMS2	0.347886
P18T6	spheroids	CMS2																CMS2	CMS2	0.772877
P19TB8	spheroids	N/A																	CMS1	0.39545
P20T12	spheroids	CMS2																CMS2	CMS2	0.75639
P23T	spheroids	N/A																	CMS1	0.303587
P24TA8	spheroids	N/A																	CMS2	0.306876
P24TB	spheroids	CMS2																CMS2	CMS2	0.721196
P25T+7	spheroids	N/A																	CMS2	0.42721
P26T	spheroids	CMS4																CMS4	CMS4	0.545141
P28T	spheroids	N/A																	CMS2	0.314053
P31T	spheroids	N/A																	CMS2	0.406644
P6T1	spheroids	CMS2																CMS2	CMS2	0.670952
P7T14	spheroids	CMS2																CMS2	CMS2	0.671161
P8T7	spheroids	CMS1																CMS1	CMS1	0.553766
P9T14	spheroids	N/A																	CMS2	0.418126

## Sheet: CRIS
			CCLE			CLM			Medico			Sanger			Palermo/Rome			Spheroids			Biobank
			GSE36133			GSE100478			GSE59857			GSE68950			Unpublished			GSE100479 and GSE100549			GSE100549
Cell line	Data	Final CRIS	Predicted CRIS	Nearest CRIS	FDR	Predicted CRIS	Nearest CRIS	FDR	Predicted CRIS	Nearest CRIS	FDR	Predicted CRIS	Nearest CRIS	FDR	Predicted CRIS	Nearest CRIS	FDR	Predicted CRIS	Nearest CRIS	FDR	Predicted CRIS	Nearest CRIS	FDR
CL11	ccle	CRIS-B	CRIS-B	CRIS-B	8.44428e-05				CRIS-B	CRIS-B	0.0123413
COLO205	ccle	CRIS-E	CRIS-E	CRIS-E	0.000707572				CRIS-E	CRIS-E	0.000253056	CRIS-E	CRIS-E	0.000141815
COLO678	ccle	CRIS-B	CRIS-B	CRIS-B	0.0140252				CRIS-B	CRIS-B	0.0680193		CRIS-B	0.128225
CW2	ccle	CRIS-A	CRIS-A	CRIS-A	8.44428e-05							CRIS-A	CRIS-A	0.00586845
HCT15	ccle	N/A		CRIS-D	0.956074					CRIS-D	0.658213		CRIS-D	0.410055
HT115	ccle	N/A	CRIS-A	CRIS-A	8.44428e-05				CRIS-E	CRIS-E	0.0617663
HT29	ccle	CRIS-B	CRIS-A	CRIS-A	0.0456256				CRIS-B	CRIS-B	0.00180546	CRIS-B	CRIS-B	0.00581443
NCIH716	ccle	CRIS-D	CRIS-D	CRIS-D	0.0665591	CRIS-A	CRIS-A	0.0159051		CRIS-D	0.159623	CRIS-D	CRIS-D	0.0608128
NCIH747	ccle	CRIS-B	CRIS-B	CRIS-B	0.0892982				CRIS-B	CRIS-B	0.00153255	CRIS-A	CRIS-A	0.00251328
SKCO1	ccle	CRIS-B	CRIS-B	CRIS-B	8.44428e-05				CRIS-B	CRIS-B	0.00376421	CRIS-A	CRIS-A	0.00141372
SW620	ccle	CRIS-D	CRIS-D	CRIS-D	8.44428e-05				CRIS-D	CRIS-D	9.9998e-05		CRIS-D	0.123701
SW837	ccle	CRIS-B	CRIS-B	CRIS-B	8.44428e-05				CRIS-B	CRIS-B	9.9998e-05	CRIS-B	CRIS-B	0.000141815
HCT116	ccle	CRIS-D		CRIS-D	0.366634		CRIS-D	0.122686	CRIS-D	CRIS-D	0.00455691		CRIS-D	0.28436
KM12	ccle	CRIS-A		CRIS-A	0.652792	CRIS-A	CRIS-A	0.0146517		CRIS-A	0.233349		CRIS-A	0.41238
LOVO	ccle	CRIS-B	CRIS-A	CRIS-A	0.0162614				CRIS-B	CRIS-B	0.000253056	CRIS-B	CRIS-B	0.0310322
LS411N	ccle	CRIS-A	CRIS-A	CRIS-A	0.000610702				CRIS-A	CRIS-A	0.0851367	CRIS-A	CRIS-A	0.00731235
RKO	ccle	N/A		CRIS-D	0.9987		CRIS-D	0.99744		CRIS-D	0.873921		CRIS-D	0.964881
SW48	ccle	N/A		CRIS-B	0.505791		CRIS-B	0.536029		CRIS-D	0.398887		CRIS-B	0.674584
C2BBE1	ccle	CRIS-D	CRIS-D	CRIS-D	8.44428e-05							CRIS-D	CRIS-D	0.000141815
CCK81	ccle	CRIS-C	CRIS-C	CRIS-C	0.00548614				CRIS-C	CRIS-C	0.0387625
HT55	ccle	CRIS-C	CRIS-C	CRIS-C	8.44428e-05	CRIS-C	CRIS-C	7.19986e-05	CRIS-C	CRIS-C	9.9998e-05	CRIS-C	CRIS-C	0.000141815
LS1034	ccle	CRIS-E	CRIS-E	CRIS-E	0.0242318				CRIS-D	CRIS-D	0.0146099	CRIS-E	CRIS-E	0.00276894
RCM1	ccle	CRIS-B	CRIS-B	CRIS-B	8.44428e-05	CRIS-B	CRIS-B	7.19986e-05	CRIS-B	CRIS-B	9.9998e-05	CRIS-B	CRIS-B	0.000239995
SNUC1	ccle	CRIS-C	CRIS-C	CRIS-C	0.0208893	CRIS-C	CRIS-C	7.19986e-05	CRIS-C	CRIS-C	0.000221424	CRIS-C	CRIS-C	0.000141815
SW1116	ccle	CRIS-B	CRIS-B	CRIS-B	8.44428e-05				CRIS-B	CRIS-B	9.9998e-05	CRIS-B	CRIS-B	0.000141815
SW1417	ccle	CRIS-B	CRIS-B	CRIS-B	8.44428e-05				CRIS-B	CRIS-B	9.9998e-05	CRIS-B	CRIS-B	0.000141815
SW1463	ccle	CRIS-E	CRIS-E	CRIS-E	8.44428e-05	CRIS-E	CRIS-E	7.19986e-05	CRIS-E	CRIS-E	9.9998e-05	CRIS-E	CRIS-E	0.000141815
SW948	ccle	CRIS-E	CRIS-E	CRIS-E	8.44428e-05	CRIS-E	CRIS-E	7.19986e-05	CRIS-E	CRIS-E	9.9998e-05	CRIS-E	CRIS-E	0.00145597
T84	ccle	CRIS-C	CRIS-C	CRIS-C	8.44428e-05				CRIS-C	CRIS-C	9.9998e-05	CRIS-C	CRIS-C	0.00192702
CL40	ccle	CRIS-A	CRIS-A	CRIS-A	8.44428e-05	CRIS-A	CRIS-A	7.19986e-05	CRIS-B	CRIS-B	9.9998e-05
LS180	ccle	CRIS-A	CRIS-A	CRIS-A	8.44428e-05	CRIS-A	CRIS-A	7.19986e-05	CRIS-A	CRIS-A	9.9998e-05
LS513	ccle	CRIS-E	CRIS-E	CRIS-E	0.00167197	CRIS-A	CRIS-A	7.19986e-05	CRIS-E	CRIS-E	0.000281813	CRIS-E	CRIS-E	0.00266837
COLO320	ccle	CRIS-D	CRIS-D	CRIS-D	0.0207296		CRIS-D	0.205803	CRIS-D	CRIS-D	0.00377805	CRIS-D	CRIS-D	0.0253928
HUTU80	ccle	CRIS-D	CRIS-D	CRIS-D	0.00408185	CRIS-D	CRIS-D	0.0242995	CRIS-D	CRIS-D	9.9998e-05
LS123	ccle	CRIS-B	CRIS-B	CRIS-B	8.44428e-05				CRIS-B	CRIS-B	9.9998e-05	CRIS-B	CRIS-B	0.000141815
MDST8	ccle	CRIS-D		CRIS-D	0.306221	CRIS-D	CRIS-D	0.0626902		CRIS-D	0.392078
OUMS23	ccle	CRIS-D	CRIS-D	CRIS-D	8.44428e-05	CRIS-D	CRIS-D	0.0528082	CRIS-D	CRIS-D	9.9998e-05
CL14	ccle	N/A	CRIS-C	CRIS-C	8.44428e-05				CRIS-D	CRIS-D	9.9998e-05
CL34	ccle	CRIS-A	CRIS-A	CRIS-A	8.44428e-05				CRIS-A	CRIS-A	9.76358e-05
DLD1	ccle	CRIS-A		CRIS-A	0.228542				CRIS-A	CRIS-A	0.00377106
GP2D	ccle	CRIS-D	CRIS-C	CRIS-C	0.0187933				CRIS-D	CRIS-D	0.0752116	CRIS-D	CRIS-D	0.117501
HCC56	ccle	CRIS-E	CRIS-E	CRIS-E	8.44428e-05
HS675T	ccle	N/A		CRIS-D	0.324581
HS698T	ccle	N/A		CRIS-D	0.366707
NCIH508	ccle	CRIS-C	CRIS-C	CRIS-C	8.44428e-05				CRIS-C	CRIS-C	0.0581632	CRIS-C	CRIS-C	0.000135649
SNU1040	ccle	N/A		CRIS-A	0.278341				CRIS-D	CRIS-D	0.000833901
SNU175	ccle	CRIS-A		CRIS-A	0.143761				CRIS-A	CRIS-A	0.00280314
SNU283	ccle	CRIS-C	CRIS-C	CRIS-C	8.44428e-05				CRIS-C	CRIS-C	9.76358e-05
SNU407	ccle	N/A	CRIS-E	CRIS-E	0.0283048					CRIS-B	0.127358
SNU503	ccle	CRIS-D	CRIS-D	CRIS-D	0.000211107				CRIS-D	CRIS-D	0.000138803
SNU61	ccle	CRIS-B	CRIS-B	CRIS-B	8.44428e-05				CRIS-B	CRIS-B	9.76358e-05
SNUC2A	ccle	N/A	CRIS-B	CRIS-B	0.0340365				CRIS-D	CRIS-D	0.0138773
SNUC4	ccle	CRIS-A	CRIS-A	CRIS-A	8.44428e-05				CRIS-A	CRIS-A	9.9998e-05
SNUC5	ccle	CRIS-B	CRIS-B	CRIS-B	0.0205196				CRIS-B	CRIS-B	0.0930719
SW403	ccle	CRIS-E	CRIS-E	CRIS-E	8.44428e-05				CRIS-E	CRIS-E	9.9998e-05	CRIS-D	CRIS-D	0.00100284
SW480	ccle	CRIS-D	CRIS-D	CRIS-D	0.026077				CRIS-D	CRIS-D	0.000253056
CAR1	clm	CRIS-B				CRIS-B	CRIS-B	7.19986e-05	CRIS-B	CRIS-B	9.9998e-05	CRIS-B	CRIS-B	0.000135649
HCC2998	medico	CRIS-B							CRIS-B	CRIS-B	0.0163733	CRIS-B	CRIS-B	0.0468798
SNUC2B	medico	N/A							CRIS-A	CRIS-A	0.000253056	CRIS-B	CRIS-B	0.0173397
LS174T	medico	CRIS-A							CRIS-A	CRIS-A	9.9998e-05	CRIS-A	CRIS-A	0.000141815
NCIH630	medico	N/A								CRIS-D	0.527327	CRIS-C	CRIS-C	0.00668074
GP5D	medico	CRIS-C							CRIS-C	CRIS-C	0.023032	CRIS-C	CRIS-C	0.00917262
COLO201	medico	CRIS-B							CRIS-B	CRIS-B	0.000355407
HDC135	medico	N/A								CRIS-B	0.400041
HDC9	medico	CRIS-A							CRIS-A	CRIS-A	9.9998e-05
HROC24	medico	CRIS-A							CRIS-A	CRIS-A	9.9998e-05
HROC87	medico	CRIS-A							CRIS-A	CRIS-A	9.9998e-05
KM20	medico	CRIS-B							CRIS-B	CRIS-B	0.00592901
LIM2412	medico	CRIS-D							CRIS-D	CRIS-D	0.0241526
LIM2551	medico	CRIS-B							CRIS-B	CRIS-B	0.0101265
SNU1033	medico	CRIS-D							CRIS-D	CRIS-D	9.9998e-05
HROC32	medico	CRIS-C							CRIS-C	CRIS-C	9.9998e-05
HROC69	medico	N/A								CRIS-D	0.74512
V457	medico	N/A								CRIS-B	0.172175
HROC39	medico	CRIS-C							CRIS-C	CRIS-C	9.9998e-05
HROC46	medico	CRIS-D							CRIS-D	CRIS-D	9.9998e-05
SNU1047	medico	CRIS-D							CRIS-D	CRIS-D	9.9998e-05
SW1222	medico	CRIS-C							CRIS-C	CRIS-C	9.9998e-05
WIDR	medico	CRIS-B							CRIS-B	CRIS-B	0.000253056
HROC80	medico	CRIS-B							CRIS-B	CRIS-B	9.9998e-05
COLO60H	medico	CRIS-E							CRIS-E	CRIS-E	0.00562244
HROC18	medico	CRIS-B							CRIS-B	CRIS-B	9.9998e-05
COGA1	medico	CRIS-A							CRIS-A	CRIS-A	0.00564741
COGA2	medico	CRIS-E							CRIS-E	CRIS-E	9.9998e-05
COGA3	medico	N/A								CRIS-C	0.265421
COGA8	medico	CRIS-C							CRIS-C	CRIS-C	9.9998e-05
COGA12	medico	CRIS-E							CRIS-E	CRIS-E	9.9998e-05
HDC8	medico	CRIS-B							CRIS-B	CRIS-B	0.0192085
C170	medico	CRIS-B							CRIS-B	CRIS-B	0.0153575
V703	medico	CRIS-C							CRIS-C	CRIS-C	9.9998e-05
HCA24	medico	CRIS-C							CRIS-C	CRIS-C	0.000253056
V481	medico	CRIS-A							CRIS-A	CRIS-A	9.9998e-05
MIP101	medico	N/A								CRIS-A	0.565362
HRA16	medico	CRIS-C							CRIS-C	CRIS-C	9.9998e-05
LIM1215	medico	N/A								CRIS-C	0.584536
CX1	medico	N/A								CRIS-A	0.388489
VACO5	medico	N/A								CRIS-D	0.964581
VACO432	medico	CRIS-A							CRIS-A	CRIS-A	0.099198
HCA7	medico	CRIS-B							CRIS-B	CRIS-B	0.0750538
LIM2405	medico	N/A								CRIS-B	0.211339
HDC82	medico	CRIS-C							CRIS-C	CRIS-C	9.9998e-05
HDC142	medico	CRIS-D							CRIS-D	CRIS-D	9.9998e-05
HDC54	medico	CRIS-C							CRIS-C	CRIS-C	9.9998e-05
OXCO1	medico	N/A								CRIS-D	0.335339
LIM2537	medico	CRIS-D							CRIS-D	CRIS-D	0.0191209
LIM1899	medico	N/A								CRIS-E	0.206456
LIM2099	medico	CRIS-B							CRIS-B	CRIS-B	0.000138803
OXCO2	medico	CRIS-C							CRIS-C	CRIS-C	9.9998e-05
OXCO3	medico	CRIS-B							CRIS-B	CRIS-B	9.9998e-05
COGA5	medico	CRIS-B							CRIS-B	CRIS-B	0.000811889
COGA5L	medico	CRIS-B							CRIS-B	CRIS-B	9.9998e-05
COLO94H	medico	CRIS-E							CRIS-E	CRIS-E	9.9998e-05
FET	medico	N/A								CRIS-A	0.188402
FHC	medico	CRIS-D							CRIS-D	CRIS-D	0.0994402
RW7213	medico	CRIS-A							CRIS-A	CRIS-A	9.9998e-05
SNU1411	medico	CRIS-B							CRIS-B	CRIS-B	0.00259995
SNU1460	medico	CRIS-C							CRIS-C	CRIS-C	9.9998e-05
SNU81	medico	CRIS-B							CRIS-B	CRIS-B	9.9998e-05
CACO2	medico	CRIS-D							CRIS-D	CRIS-D	9.9998e-05
HCT8	medico	CRIS-D							CRIS-D	CRIS-D	0.000138803
COCM1	medico	CRIS-C							CRIS-C	CRIS-C	9.9998e-05
LIM2550	medico	N/A								CRIS-D	0.272311
COLO320DM	medico	CRIS-D							CRIS-D	CRIS-D	0.00998538
DIFI	medico	CRIS-C							CRIS-C	CRIS-C	9.9998e-05
GEO	medico	CRIS-C							CRIS-C	CRIS-C	0.000355407
HCA46	medico	CRIS-C							CRIS-C	CRIS-C	9.9998e-05
C125PM	medico	CRIS-B							CRIS-B	CRIS-B	0.0822984
FHS	medico	CRIS-D							CRIS-D	CRIS-D	0.111934
HDC114	medico	CRIS-A							CRIS-A	CRIS-A	0.000833901
HDC143	medico	CRIS-E							CRIS-E	CRIS-E	0.000464991
KM12C	medico	CRIS-A							CRIS-A	CRIS-A	0.000535792
KM12L4	medico	CRIS-A							CRIS-A	CRIS-A	0.0167285
KM12SM	medico	CRIS-A							CRIS-A	CRIS-A	0.0011977
SNU1235	medico	N/A								CRIS-A	0.206032
SNU1406	medico	CRIS-E							CRIS-E	CRIS-E	0.000604866
SNU1544	medico	CRIS-B							CRIS-B	CRIS-B	0.000179707
C10	medico	CRIS-A							CRIS-A	CRIS-A	0.00252712
C106	medico	CRIS-C							CRIS-C	CRIS-C	9.9998e-05
C146	medico	CRIS-A							CRIS-A	CRIS-A	0.00438375
C32	medico	CRIS-C							CRIS-C	CRIS-C	9.9998e-05
C70	medico	CRIS-C							CRIS-C	CRIS-C	9.9998e-05
C75	medico	CRIS-C							CRIS-C	CRIS-C	9.9998e-05
C80	medico	CRIS-E							CRIS-E	CRIS-E	9.9998e-05
C84	medico	CRIS-B							CRIS-B	CRIS-B	9.9998e-05
C99	medico	CRIS-E							CRIS-E	CRIS-E	0.00161886
SNU1684	medico	CRIS-C							CRIS-C	CRIS-C	9.9998e-05
SNU1746	medico	CRIS-A							CRIS-A	CRIS-A	9.9998e-05
SNU254	medico	CRIS-B							CRIS-B	CRIS-B	9.9998e-05
SNU479	medico	CRIS-C							CRIS-C	CRIS-C	0.00103331
SNU70	medico	N/A								CRIS-D	0.245386
SNU977	medico	CRIS-B							CRIS-B	CRIS-B	0.00326309
NCIH498	medico	CRIS-D							CRIS-D	CRIS-D	9.76358e-05
NCIH684	medico	CRIS-B							CRIS-B	CRIS-B	0.000634927
SNU769B	medico	N/A								CRIS-A	0.12767
SNU1181	medico	CRIS-B							CRIS-B	CRIS-B	9.9998e-05
VACO6	medico	CRIS-A							CRIS-A	CRIS-A	9.9998e-05
V411	medico	CRIS-A							CRIS-A	CRIS-A	0.0581694
ColPa01-A1S1	Palermo/Rome	N/A														CRIS-A	0.626747
ColPa02-C1S3	Palermo/Rome	CRIS-B													CRIS-B	CRIS-B	0.0202329
ColPa03-E1S5	Palermo/Rome	CRIS-A													CRIS-A	CRIS-A	0.00402345
ColPa04-G1S7	Palermo/Rome	N/A														CRIS-C	0.203014
ColPa05-A2S9	Palermo/Rome	CRIS-B													CRIS-B	CRIS-B	0.000119998
ColPa06-C2S11	Palermo/Rome	CRIS-C													CRIS-C	CRIS-C	0.000119998
ColPa07-E2S13	Palermo/Rome	CRIS-B													CRIS-B	CRIS-B	0.00226149
ColPa08-G2S15	Palermo/Rome	N/A														CRIS-B	0.363293
ColPa09-A3S17	Palermo/Rome	N/A														CRIS-D	0.944174
ColPa10-C3S19	Palermo/Rome	N/A														CRIS-E	0.739528
ColPa11-E3S21	Palermo/Rome	CRIS-E													CRIS-E	CRIS-E	0.000119998
ColPa12-G3S23	Palermo/Rome	N/A														CRIS-D	0.97618
ColPa13-A4S1	Palermo/Rome	CRIS-E													CRIS-E	CRIS-E	0.000119998
ColPa14-C4S3	Palermo/Rome	CRIS-E													CRIS-E	CRIS-E	0.000119998
ColPa15-E4S5	Palermo/Rome	CRIS-E													CRIS-E	CRIS-E	0.000599988
ColPa16-G4S7	Palermo/Rome	CRIS-B													CRIS-B	CRIS-B	0.0737354
ColPa17-B5S10	Palermo/Rome	CRIS-C													CRIS-C	CRIS-C	0.000119998
ColPa18-D5S12	Palermo/Rome	CRIS-E													CRIS-E	CRIS-E	0.000119998
ColPa19-F5S14	Palermo/Rome	CRIS-E													CRIS-E	CRIS-E	0.00244281
ColPa20-H5S16	Palermo/Rome	CRIS-A													CRIS-A	CRIS-A	0.107998
ColPa21-B6S18	Palermo/Rome	CRIS-C													CRIS-C	CRIS-C	0.000490899
ColPa22-D6S20	Palermo/Rome	N/A														CRIS-C	0.689455
ColPa23-F6S22	Palermo/Rome	N/A														CRIS-B	0.248552
ColPa24-H6S24	Palermo/Rome	CRIS-D													CRIS-D	CRIS-D	0.000119998
ColPa25-B7S26	Palermo/Rome	N/A														CRIS-D	0.758518
ColPa26-D7S28	Palermo/Rome	CRIS-A													CRIS-A	CRIS-A	0.000119998
ColPa27-F7S30	Palermo/Rome	CRIS-A													CRIS-A	CRIS-A	0.00247995
ColPa28-H7S32	Palermo/Rome	CRIS-C													CRIS-C	CRIS-C	0.100528
ColPa29-B8S34	Palermo/Rome	CRIS-D													CRIS-D	CRIS-D	0.000119998
ColPa30-D8S36	Palermo/Rome	CRIS-E													CRIS-E	CRIS-E	0.00299994
AG2	spheroids	CRIS-C																CRIS-C	CRIS-C	8.79982e-05	CRIS-C	CRIS-C	7.99984e-05
CO108	spheroids	CRIS-C																CRIS-C	CRIS-C	0.000504696	CRIS-C	CRIS-C	7.99984e-05
CO115	spheroids	CRIS-E								CRIS-B	0.666813							CRIS-E	CRIS-E	0.000371243	CRIS-E	CRIS-E	7.99984e-05
CO123	spheroids	CRIS-A																CRIS-A	CRIS-A	8.79982e-05	CRIS-A	CRIS-A	7.99984e-05
CO147	spheroids	CRIS-D																CRIS-D	CRIS-D	8.79982e-05	CRIS-D	CRIS-D	7.99984e-05
CO152	spheroids	CRIS-C																CRIS-C	CRIS-C	0.0417747	CRIS-C	CRIS-C	7.99984e-05
CONC	spheroids	CRIS-B																CRIS-B	CRIS-B	0.0721271	CRIS-B	CRIS-B	0.00485324
DA13	spheroids	N/A																	CRIS-D	0.320226		CRIS-D	0.45568
G605	spheroids	CRIS-C																CRIS-C	CRIS-C	8.79982e-05	CRIS-C	CRIS-C	0.000104998
GTG7	spheroids	CRIS-C																	CRIS-C	0.764698	CRIS-C	CRIS-C	0.0875542
LR13	spheroids	N/A																	CRIS-A	0.406509		CRIS-A	0.553709
LR14	spheroids	CRIS-A																CRIS-A	CRIS-A	8.79982e-05	CRIS-A	CRIS-A	7.99984e-05
ME59	spheroids	N/A																	CRIS-D	0.140099		CRIS-D	0.349083
RC511	spheroids	N/A																	CRIS-D	0.927141	CRIS-B	CRIS-B	0.0814784
LM23	spheroids	CRIS-C																CRIS-C	CRIS-C	8.79982e-05
P11T	spheroids	CRIS-A																CRIS-A	CRIS-A	0.0415284
P14T10	spheroids	CRIS-C																CRIS-C	CRIS-C	8.79982e-05
P16T7	spheroids	CRIS-E																CRIS-E	CRIS-E	0.00386564
P17T10	spheroids	CRIS-C																CRIS-C	CRIS-C	0.00763289
P18T6	spheroids	CRIS-D																CRIS-D	CRIS-D	8.79982e-05
P19TB8	spheroids	CRIS-A																CRIS-A	CRIS-A	8.79982e-05
P20T12	spheroids	CRIS-D																CRIS-D	CRIS-D	0.00329993
P23T	spheroids	CRIS-B																CRIS-B	CRIS-B	0.00164997
P24TA8	spheroids	CRIS-E																CRIS-E	CRIS-E	0.00968861
P24TB	spheroids	CRIS-A																CRIS-A	CRIS-A	8.79982e-05
P25T+7	spheroids	CRIS-B																CRIS-B	CRIS-B	8.79982e-05
P26T	spheroids	CRIS-D																CRIS-D	CRIS-D	0.00767235
P28T	spheroids	CRIS-B																CRIS-B	CRIS-B	0.00333293
P31T	spheroids	CRIS-A																CRIS-A	CRIS-A	8.79982e-05
P6T1	spheroids	CRIS-E																CRIS-E	CRIS-E	8.79982e-05
P7T14	spheroids	CRIS-C																CRIS-C	CRIS-C	8.79982e-05
P8T7	spheroids	CRIS-A																CRIS-A	CRIS-A	0.0048599
P9T14	spheroids	CRIS-B																CRIS-B	CRIS-B	8.79982e-05

## Sheet: Final Classes for Sanger lines
	>0.667 concordance
	Prob>0.5 CMS 3datasets						FDR<=0.1 CRIS 3datasets
cellline	HCMS	Highest	HCMS.percentage	Overal.CMS.percentage	#datasets	HCMS.No.predictions	HCRIS	Highest	HCRIS.percentage	Overal.CRIS.percentage	#datasets	HCRIS.No.predictions
CL11	NA	NA	0	0	1	0	CRIS-B	CRIS-B	1	1	1	1
COLO205	CMS2	NA	1	0.5	2	1	CRIS-E	CRIS-E	1	1	2	2
COLO678	NA	NA	0.5	0.5	2	2	CRIS-B	NA	1	0.5	2	1
CW2	NA	NA	0	0	2	0	CRIS-A	CRIS-A	1	1	2	2
HCT15	NA	NA	0	0	2	0	NA	NA	0	0	2	0
HT115	NA	NA	0	0	1	0	CRIS-A	CRIS-A	1	1	1	1
HT29	NA	NA	0	0	2	0	NA	NA	0.5	0.5	2	2
NCIH716	CMS4	CMS4	1	1	3	3	CRIS-D	CRIS-D	0.666667	0.666667	3	3
NCIH747	CMS4	NA	1	0.5	2	1	NA	NA	0.5	0.5	2	2
SKCO1	NA	NA	0	0	2	0	NA	NA	0.5	0.5	2	2
SW620	CMS4	NA	1	0.5	2	1	CRIS-D	NA	1	0.5	2	1
SW837	CMS4	CMS4	1	1	2	2	CRIS-B	CRIS-B	1	1	2	2
HCT116	CMS1	CMS1	1	0.666667	3	2	NA	NA	0	0	3	0
KM12	CMS1	CMS1	1	0.666667	3	2	CRIS-A	NA	1	0.333333	3	1
LOVO	CMS1	NA	1	0.5	2	1	NA	NA	0.5	0.5	2	2
LS411N	CMS1	NA	1	0.5	2	1	CRIS-A	CRIS-A	1	1	2	2
RKO	CMS1	CMS1	1	1	3	3	NA	NA	0	0	3	0
SW48	CMS1	CMS1	1	1	3	3	NA	NA	0	0	3	0
C2BBE1	CMS4	NA	1	0.5	2	1	CRIS-D	CRIS-D	1	1	2	2
CCK81	CMS2	CMS2	1	1	1	1	CRIS-C	CRIS-C	1	1	1	1
HT55	CMS2	CMS2	1	1	3	3	CRIS-C	CRIS-C	1	1	3	3
LS1034	CMS2	CMS2	1	1	2	2	CRIS-E	CRIS-E	1	1	2	2
RCM1	CMS2	CMS2	1	1	3	3	CRIS-B	CRIS-B	1	1	3	3
SNUC1	CMS2	CMS2	1	1	3	3	CRIS-C	CRIS-C	1	1	3	3
SW1116	CMS2	CMS2	1	1	2	2	CRIS-B	CRIS-B	1	1	2	2
SW1417	CMS2	CMS2	1	1	2	2	CRIS-B	CRIS-B	1	1	2	2
SW1463	CMS2	CMS2	1	1	3	3	CRIS-E	CRIS-E	1	1	3	3
SW948	CMS2	CMS2	1	1	3	3	CRIS-E	CRIS-E	1	1	3	3
T84	CMS2	CMS2	1	1	2	2	CRIS-C	CRIS-C	1	1	2	2
CL40	CMS3	CMS3	1	1	2	2	CRIS-A	CRIS-A	1	1	2	2
LS180	CMS3	CMS3	1	1	2	2	CRIS-A	CRIS-A	1	1	2	2
LS513	CMS3	CMS3	1	1	3	3	CRIS-E	CRIS-E	0.666667	0.666667	3	3
COLO320	CMS4	CMS4	1	1	3	3	CRIS-D	CRIS-D	1	1	3	3
HUTU80	CMS4	CMS4	1	1	2	2	CRIS-D	CRIS-D	1	1	2	2
LS123	CMS4	CMS4	1	1	2	2	CRIS-B	CRIS-B	1	1	2	2
MDST8	CMS4	CMS4	1	1	2	2	CRIS-D	NA	1	0.5	2	1
OUMS23	CMS4	CMS4	1	1	2	2	CRIS-D	CRIS-D	1	1	2	2
CL14	CMS2	CMS2	1	1	1	1	CRIS-C	CRIS-C	1	1	1	1
CL34	CMS3	CMS3	1	1	1	1	CRIS-A	CRIS-A	1	1	1	1
COLO741	CMS4	CMS4	1	1	2	2	NA	NA	0	0	2	0
DLD1	NA	NA	0	0	1	0	NA	NA	0	0	1	0
GP2D	CMS2	CMS2	1	1	2	2	NA	NA	0.5	0.5	2	2
HCC56	CMS2	CMS2	1	1	1	1	CRIS-E	CRIS-E	1	1	1	1
HS675T	CMS4	CMS4	1	1	1	1	NA	NA	0	0	1	0
HS698T	CMS4	CMS4	1	1	1	1	NA	NA	0	0	1	0
NCIH508	CMS2	CMS2	1	1	2	2	CRIS-C	CRIS-C	1	1	2	2
SNU1040	NA	NA	0	0	1	0	NA	NA	0	0	1	0
SNU175	NA	NA	0	0	1	0	NA	NA	0	0	1	0
SNU283	CMS2	CMS2	1	1	1	1	CRIS-C	CRIS-C	1	1	1	1
SNU407	NA	NA	0	0	1	0	CRIS-E	CRIS-E	1	1	1	1
SNU503	CMS4	CMS4	1	1	1	1	CRIS-D	CRIS-D	1	1	1	1
SNU61	CMS2	CMS2	1	1	1	1	CRIS-B	CRIS-B	1	1	1	1
SNUC2A	NA	NA	0	0	1	0	CRIS-B	CRIS-B	1	1	1	1
SNUC4	NA	NA	0	0	1	0	CRIS-A	CRIS-A	1	1	1	1
SNUC5	CMS1	CMS1	1	1	1	1	CRIS-B	CRIS-B	1	1	1	1
SW403	NA	NA	0.5	0.5	2	2	NA	NA	0.5	0.5	2	2
SW480	CMS4	CMS4	1	1	1	1	CRIS-D	CRIS-D	1	1	1	1
CAR1	CMS4	CMS4	1	1	2	2	CRIS-B	CRIS-B	1	1	2	2
HCC2998	CMS2	CMS2	1	1	1	1	CRIS-B	CRIS-B	1	1	1	1
SNUC2B	NA	NA	0	0	1	0	CRIS-B	CRIS-B	1	1	1	1
LS174T	CMS3	CMS3	1	1	1	1	CRIS-A	CRIS-A	1	1	1	1
NCIH630	CMS2	CMS2	1	1	1	1	CRIS-C	CRIS-C	1	1	1	1
GP5D	CMS2	CMS2	1	1	1	1	CRIS-C	CRIS-C	1	1	1	1
AG2
CO108
CO115
CO123
CO147
CO152
CONC
DA13
G605
GTG7
LR13
LR14
ME59
RC511
LM23
P11T
P14T10
P16T7
P17T10
P18T6
P19TB8
P20T12
P23T
P24TA8
P24TB
P25T+7
P26T
P28T
P31T
P6T1
P7T14
P8T7
P9T14
COLO201
HDC135
HDC9
HROC24
HROC87
KM20
LIM2412
LIM2551
SNU1033
HROC32
HROC69
V457
HROC39
HROC46
SNU1047
SW1222
WIDR
HROC80
COLO60H
HROC18
COGA1
COGA2
COGA3
COGA8
COGA12
HDC8
C170
V703
HCA24
V481
MIP101
HRA16
LIM1215
CX1
VACO5
VACO432
HCA7
LIM2405
HDC82
HDC142
HDC54
OXCO1
LIM2537
LIM1899
LIM2099
OXCO2
OXCO3
COGA5
COGA5L
COLO94H
FET
FHC
RW7213
SNU1411
SNU1460
SNU81
CACO2
HCT8
COCM1
LIM2550
COLO320DM
DIFI
GEO
HCA46
C125PM
FHS
HDC114
HDC143
KM12C
KM12L4
KM12SM
SNU1235
SNU1406
SNU1544
C10
C106
C146
C32
C70
C75
C80
C84
C99
SNU1684
SNU1746
SNU254
SNU479
SNU70
SNU977
NCIH498
NCIH684
SNU769B
SNU1181
VACO6
V411
A1S1
C1S3
E1S5
G1S7
A2S9
C2S11
E2S13
G2S15
A3S17
C3S19
E3S21
G3S23
A4S1
C4S3
E4S5
G4S7
B5S10
D5S12
F5S14
H5S16
B6S18
D6S20
F6S22
H6S24
B7S26
D7S28
F7S30
H7S32
B8S34
D8S36

## Sheet: caleydo
cellline	CMS	CRIS
CL11	NA	CRIS-B
COLO205	NA	CRIS-E
COLO678	NA	NA
CW2	NA	CRIS-A
HCT15	NA	NA
HT115	NA	CRIS-A
HT29	NA	NA
NCIH716	CMS4	CRIS-D
NCIH747	NA	NA
SKCO1	NA	NA
SW620	NA	NA
SW837	CMS4	CRIS-B
HCT116	CMS1	NA
KM12	CMS1	NA
LOVO	NA	NA
LS411N	NA	CRIS-A
RKO	CMS1	NA
SW48	CMS1	NA
C2BBE1	NA	CRIS-D
CCK81	CMS2	CRIS-C
HT55	CMS2	CRIS-C
LS1034	CMS2	CRIS-E
RCM1	CMS2	CRIS-B
SNUC1	CMS2	CRIS-C
SW1116	CMS2	CRIS-B
SW1417	CMS2	CRIS-B
SW1463	CMS2	CRIS-E
SW948	CMS2	CRIS-E
T84	CMS2	CRIS-C
CL40	CMS3	CRIS-A
LS180	CMS3	CRIS-A
LS513	CMS3	CRIS-E
COLO320	CMS4	CRIS-D
HUTU80	CMS4	CRIS-D
LS123	CMS4	CRIS-B
MDST8	CMS4	NA
OUMS23	CMS4	CRIS-D
CL14	CMS2	CRIS-C
CL34	CMS3	CRIS-A
COLO741	CMS4	NA
DLD1	NA	NA
GP2D	CMS2	NA
HCC56	CMS2	CRIS-E
HS675T	CMS4	NA
HS698T	CMS4	NA
NCIH508	CMS2	CRIS-C
SNU1040	NA	NA
SNU175	NA	NA
SNU283	CMS2	CRIS-C
SNU407	NA	CRIS-E
SNU503	CMS4	CRIS-D
SNU61	CMS2	CRIS-B
SNUC2A	NA	CRIS-B
SNUC4	NA	CRIS-A
SNUC5	CMS1	CRIS-B
SW403	NA	NA
SW480	CMS4	CRIS-D
CAR1	CMS4	CRIS-B
HCC2998	CMS2	CRIS-B
SNUC2B	NA	CRIS-B
LS174T	CMS3	CRIS-A
NCIH630	CMS2	CRIS-C
GP5D	CMS2	CRIS-C

## Sheet: caleydo.Without.NA
cellline	CMS	CRIS
SNUC5	CMS1	CRIS-B
RCM1	CMS2	CRIS-B
SW1116	CMS2	CRIS-B
SW1417	CMS2	CRIS-B
SNU61	CMS2	CRIS-B
HCC2998	CMS2	CRIS-B
CCK81	CMS2	CRIS-C
HT55	CMS2	CRIS-C
SNUC1	CMS2	CRIS-C
T84	CMS2	CRIS-C
CL14	CMS2	CRIS-C
NCIH508	CMS2	CRIS-C
SNU283	CMS2	CRIS-C
NCIH630	CMS2	CRIS-C
GP5D	CMS2	CRIS-C
LS1034	CMS2	CRIS-E
SW1463	CMS2	CRIS-E
SW948	CMS2	CRIS-E
HCC56	CMS2	CRIS-E
CL40	CMS3	CRIS-A
LS180	CMS3	CRIS-A
CL34	CMS3	CRIS-A
LS174T	CMS3	CRIS-A
LS513	CMS3	CRIS-E
SW837	CMS4	CRIS-B
LS123	CMS4	CRIS-B
CAR1	CMS4	CRIS-B
NCIH716	CMS4	CRIS-D
COLO320	CMS4	CRIS-D
HUTU80	CMS4	CRIS-D
OUMS23	CMS4	CRIS-D
SNU503	CMS4	CRIS-D
SW480	CMS4	CRIS-D
